# Supplementary material for: La gestión de residuos en Europa
Source: Royal Society of Chemistry journal article supplement (doi:10.1039/c8ra06451b), 2001-01-01
Supplement: c8ra06451b1.pdf [file c8ra06451b1.pdf]

SUPPORTING INFORMATION

Improving the nutrient removal performance of surface  
flow constructed wetlands in winter using hardy  
submerged plant-benthic fauna systems

Ying Guo<sup>a</sup>, Huijun Xie<sup>b</sup>, Jian Zhang<sup>a,c,\*</sup>, Wengang Wang<sup>d</sup>, Huu Hao Ngo<sup>e</sup>, Wenshan  
Guo<sup>e</sup>, Yan Kang<sup>a</sup>, Bowei Zhang<sup>b</sup>

*<sup>a</sup>Shandong Key Laboratory of Water Pollution Control and Resource Reuse, School of  
Environmental Science and Engineering, Shandong University, Jinan, Shandong  
250100, China*

*<sup>b</sup>Environmental Research Institute, Shandong University, Jinan 250100, China*

*<sup>c</sup>State key Laboratory of Microbial Technology, Shandong University, Jinan 250100,  
China*

*<sup>d</sup>Shandong Academy of Environmental Science, Broadway, Jinan 250100, PR China*

*<sup>e</sup>School of Civil and Environmental Engineering, University of Technology Sydney,  
Broadway, NSW 2007, Australia*

\*Correspondence: zhangjian00@sdu.edu.cn (J. Zhang)

Tel: 0086-531-88361185, Fax: 0086-531-8836978

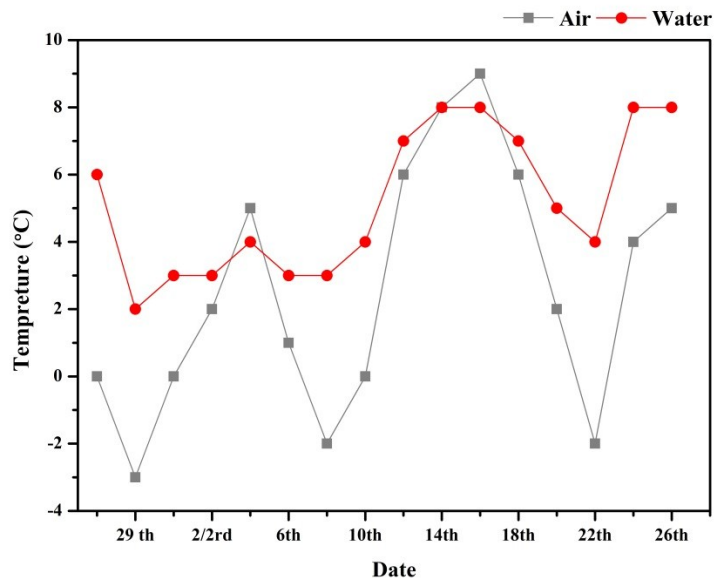

**Fig.S1.** Air, water temperature during the experiment period

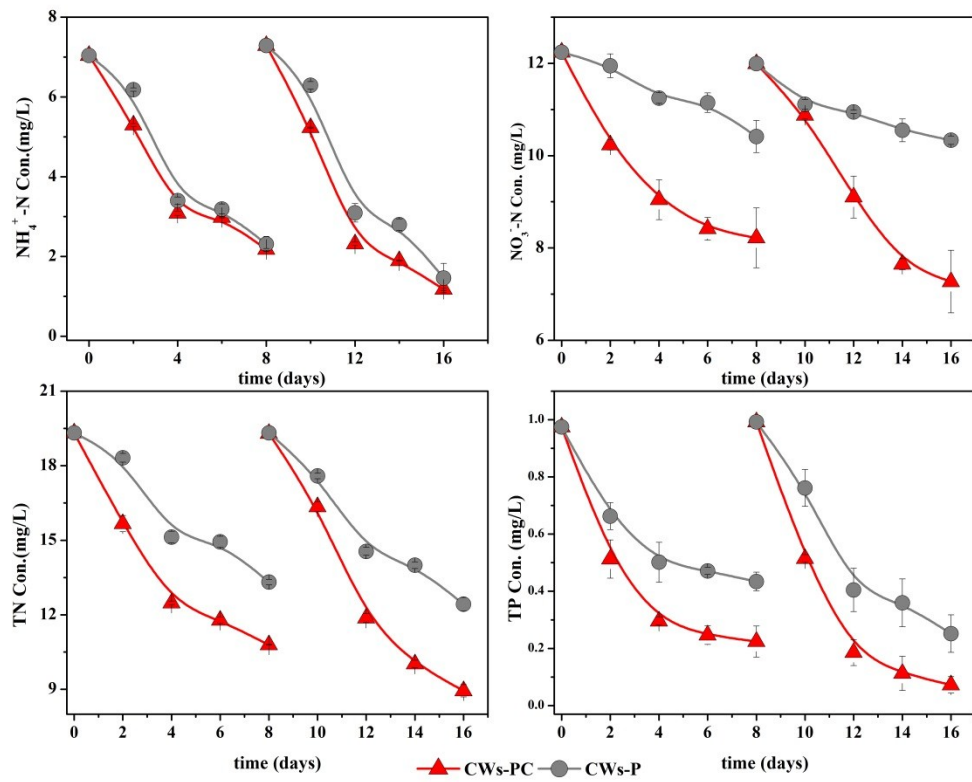

**Fig.S2.** Treatment performance on NH<sub>4</sub><sup>+</sup>-N, NO<sub>3</sub><sup>-</sup>-N, TN and TP for each group during two unstable operating cycles

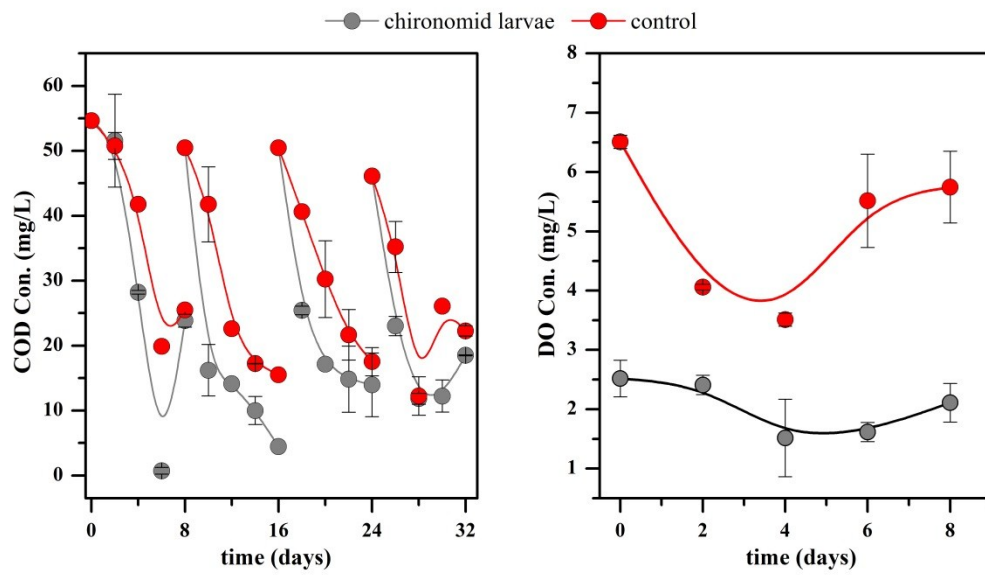

**Fig.S3.** Treatment performance on COD for each group during four typical operating cycles (a) Typical DO profile in each group (b)

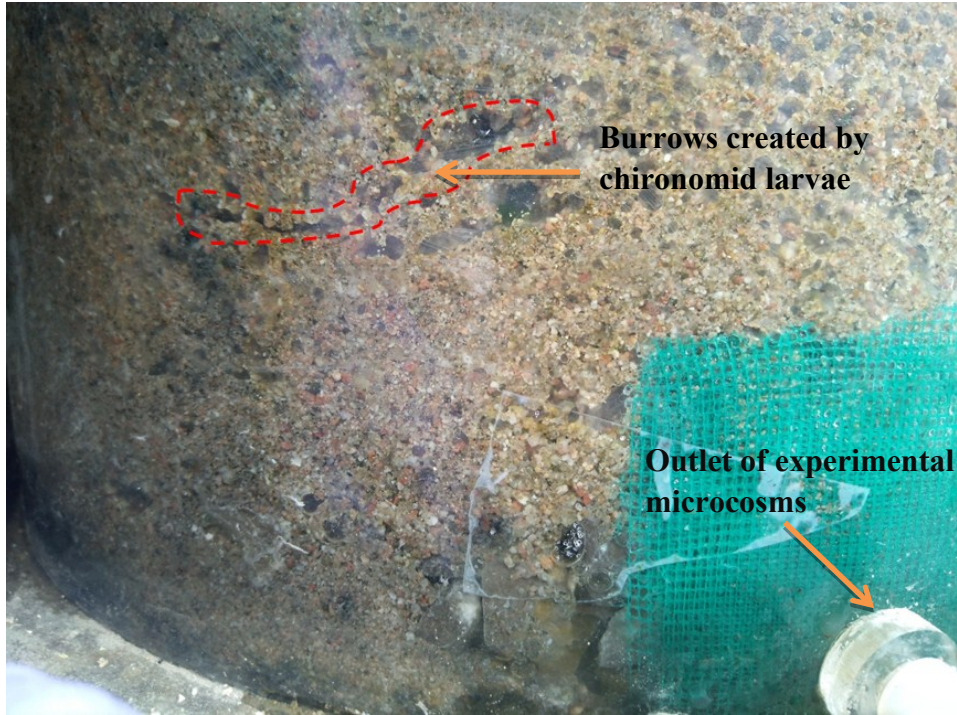

**Fig. S4** Picture showing the burrows produced by chironomid larvae at the US layer

**Table S1.** Primers of target genes used in qPCR analysis.

| Target gene        | Primer    | Primer sequence (5'-3')              | Amplification size (bp) | Reference               |
|--------------------|-----------|--------------------------------------|-------------------------|-------------------------|
| Bacterial 16S rRNA | 338F      | ACTCCTACGGGAGGCAGCAG                 | 180                     | (Muyzer et al., 1993)   |
|                    | 518R      | ATTACCGCGGCTGCTGG                    |                         |                         |
| <i>amoA</i>        | amo598f   | GAATATGTTCGCCTGATTG                  | 120                     | (Dionisi et al., 2002)  |
|                    | amo718r   | CAAAGTACCACCATACGCAG                 |                         |                         |
| <i>nirK</i>        | nirK583F  | TCA TGGTGCTGCCGCGKGACGG              | 326                     | (Liu et al., 2003)      |
|                    | nirK909R  | GAA CTTGCCGGTKGCCAGAC                |                         |                         |
| <i>nirS</i>        | nirScd3aF | GT(C/G)AACGT(C/G)AAGGA(A/G)AC(C/G)GG | 425                     | (Kandeler et al., 2006) |
|                    | nirSR3cd  | GA(C/G)TTCGG(A/G)TG(C/G)GTCTTGA      |                         |                         |

**Table S2.** Total biomass over the course of the experiment

|        | Total dry weight of plant (g) |                 | Total dry weight of larvae (g) |                  |
|--------|-------------------------------|-----------------|--------------------------------|------------------|
|        | initial                       | final           | initial                        | final            |
| CWs-PC | $0.23 \pm 0.02$               | $4.10 \pm 0.83$ | $18.26 \pm 0.44$               | $19.07 \pm 0.12$ |
| CWs-P  | $0.20 \pm 0.03$               | $1.30 \pm 0.14$ | -                              | -                |

--: means no data

**Table S3.** Comparison of phylotype coverage, diversity and richness estimators at a phylogenetic distance of 3%

| CWs    | Sample                         | OTUs | Shannon | Simpson( $10^{-1}$ ) | ACE     | Chao    | Good's coverage(%) |
|--------|--------------------------------|------|---------|----------------------|---------|---------|--------------------|
| CWs-P  | Superincumbent substrate layer | 2899 | 9.11    | 9.90                 | 3488.34 | 3468.78 | 98.2               |
|        | Underlying substrate layer     | 1589 | 6.16    | 9.12                 | 2076.12 | 2023.16 | 98.8               |
| CWs-PC | Superincumbent substrate layer | 2935 | 9.48    | 9.96                 | 3476.69 | 3493.08 | 98.2               |
|        | Underlying substrate layer     | 1727 | 6.44    | 9.30                 | 2241.50 | 2248.49 | 98.7               |
|        | Larvae body                    | 2001 | 6.11    | 9.27                 | 3296.32 | 3658.37 | 97.7               |



## References for supplementary materials

Dionisi, H.M., Layton, A.C., Harms, G., Gregory, I.R., Robinson, K.G., Sayler, G.S., 2002. Quantification of *Nitrosomonas oligotropha*-like ammonia-oxidizing bacteria and *Nitrospira* spp. from full-scale wastewater treatment plants by competitive PCR. *Appl. Environ. Microb.* **68**(1), 245-253.

Kandeler, E., Deiglmayr, K., Tschirko, D., Bru, D., Philippot, L., 2006. Abundance of *narG*, *nirS*, *nirK*, and *nosZ* genes of denitrifying bacteria during primary successions of a glacier foreland. *Appl. Environ. Microb.* **72**(9), 5957-5962.

Liu, X., Tiquia, S.M., Holguin, G., Wu, L., Nold, S.C., Devol, A.H., Luo, K., Palumbo, A.V., Tiedje, J.M., Zhou, J., 2003. Molecular diversity of denitrifying genes in continental margin sediments within the oxygen-deficient zone off the Pacific coast of Mexico. *Appl. Environ. Microb.* **69**(6), 3549-3560.

Muyzer, G., De Waal, E.C., Uitterlinden, A.G., 1993. Profiling of complex microbial populations by denaturing gradient gel electrophoresis analysis of polymerase chain reaction-amplified genes coding for 16S rRNA. *Appl. Environ. Microb.* **59**(3), 695-700.
